# Supplementary material for: Triple function nanocomposites of porous silica-CoFe2O4-MWCNTs as a carrier for pH-sensitive anti-cancer drug controlled delivery
Source: Royal Society of Chemistry journal article supplement (doi:10.1039/c7dt02424j), 2017-01-01
Supplement: c7dt02424j1.pdf [file c7dt02424j1.pdf]

## *Supporting information*

# Triple functions nanocomposites of porous silica-CoFe<sub>2</sub>O<sub>4</sub>-MWCNTs as carrier for pH-sensitive anti-cancer drugs controlled delivery

Huitao Fan,<sup>‡</sup> Xiaojing Xing,<sup>‡</sup> Yuhan Yang, Bo Li,<sup>\*</sup> Congcong Wang and Dongfang Qiu<sup>\*</sup>

College of Chemistry and Pharmaceutical Engineering, Nanyang Normal University,  
Nanyang 473061, China

<sup>\*</sup>Author for correspondence: E-mail: libozzu0107@163.com; qiudf2008@163.com.

<sup>‡</sup>H. T. Fan and X. J. Xing contributed equally to this work.

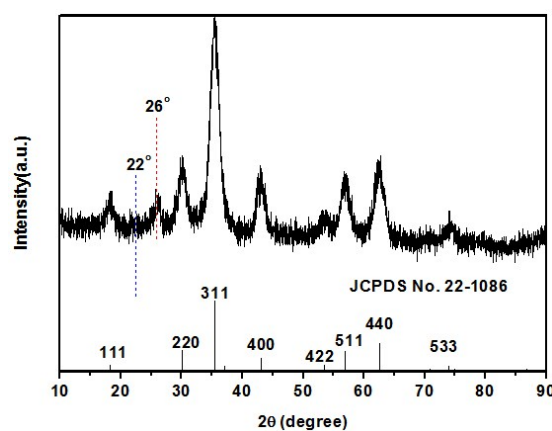

**Fig. S1.** XRD patterns of the MWCNTs@CoFe<sub>2</sub>O<sub>4</sub>@mSiO<sub>2</sub> NPs.

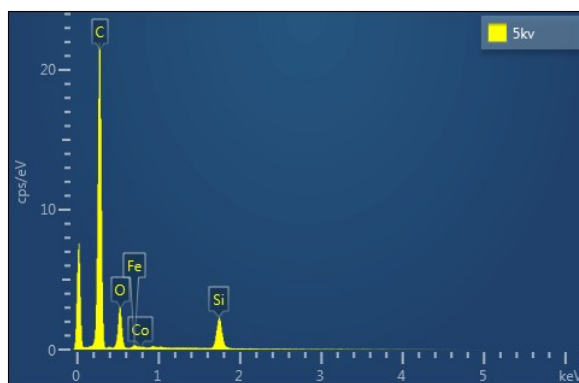

**Fig. S2.** Energy-dispersive X-ray spectrum of the MWCNTs@CoFe<sub>2</sub>O<sub>4</sub>@mSiO<sub>2</sub> NPs.

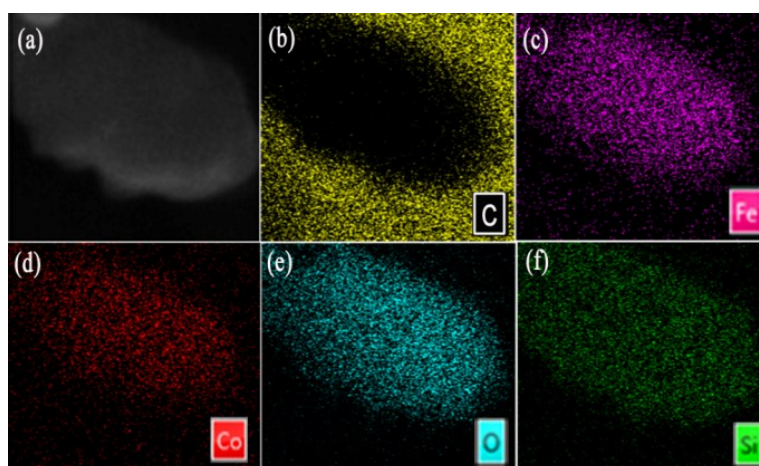

**Fig. S3.** EDX elemental mappings of the MWCNTs@CoFe<sub>2</sub>O<sub>4</sub>@mSiO<sub>2</sub> NPs (a-f).

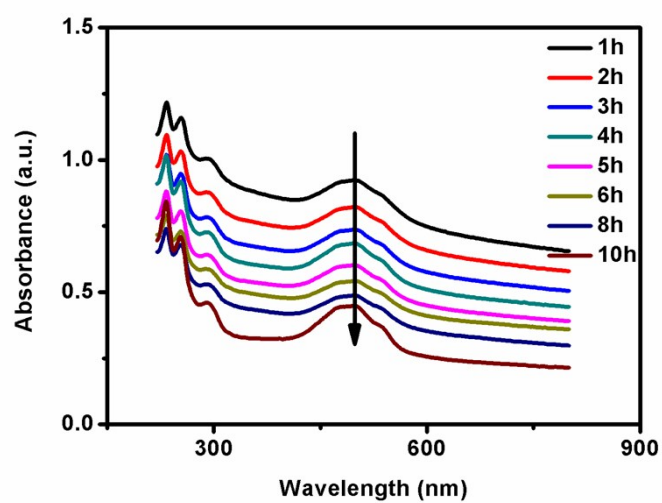

**Fig. S4.** The drug loading process of the MWCNTs@CoFe<sub>2</sub>O<sub>4</sub>@mSiO<sub>2</sub> NPs.

**Table S1.** Comparison of the efficiency for pH controlled drug release.

| nanocarrier                                                | pH  | Efficiency (%) | Time (h) | ref       |
|------------------------------------------------------------|-----|----------------|----------|-----------|
| MWCNTs@CoFe <sub>2</sub> O <sub>4</sub>                    | 7.4 | 3.8            | 72       | 36        |
| MWCNTs@CoFe <sub>2</sub> O <sub>4</sub>                    | 6.3 | 4.8            | 72       | 36        |
| MWCNTs@CoFe <sub>2</sub> O <sub>4</sub>                    | 5.2 | 30             | 72       | 36        |
| MWCNTs@CoFe <sub>2</sub> O <sub>4</sub> @mSiO <sub>2</sub> | 7.4 | 17.8           | 48       | this work |
| MWCNTs@CoFe <sub>2</sub> O <sub>4</sub> @mSiO <sub>2</sub> | 6.0 | 27.3           | 48       | this work |
| MWCNTs@CoFe <sub>2</sub> O <sub>4</sub> @mSiO <sub>2</sub> | 2.0 | 59.6           | 48       | this work |
